1 **Structure of intact human MCU supercomplex with the auxiliary MICU**  
2 **subunits**  
3

4 Wei Zhuo<sup>1,\*,†</sup>, Heng Zhou<sup>1,\*</sup>, Runyu Guo<sup>1,\*</sup>, Jingbo Yi<sup>1,\*</sup>, Lei Yu<sup>1</sup>, Yinqiang Sui<sup>2</sup>, Laixing Zhang<sup>1</sup>,  
5 Wenwen Zeng<sup>2</sup>, Peiyi Wang<sup>3,†</sup>, Maojun Yang<sup>1,†</sup>  
6

7 <sup>1</sup>*Ministry of Education Key Laboratory of Protein Science, Tsinghua-Peking Joint Center for Life*  
8 *Sciences, Beijing Advanced Innovation Center for Structural Biology, School of Life Sciences,*  
9 *Tsinghua University, Beijing 100084, China.*

10 <sup>2</sup>*Institute for Immunology and School of Medicine, Tsinghua-Peking Center for Life Sciences,*  
11 *Tsinghua University, Beijing 100084, China; Beijing Key Laboratory for Immunological Research*  
12 *on Chronic Diseases, Beijing 100084, China.*

13 <sup>3</sup>*Cryo-EM Facility Center, Southern University of Science & Technology, Shenzhen, 518055, China.*  
14

15

16

† Correspondence to: [maojunyang@tsinghua.edu.cn](mailto:maojunyang@tsinghua.edu.cn);

17

[wangpy@sustc.edu.cn](mailto:wangpy@sustc.edu.cn);

18

[zhuowei@tsinghua.edu.cn](mailto:zhuowei@tsinghua.edu.cn)

19

\*These authors contribute equally to this work.

20

21 Running Title: Cryo-EM structure of intact human MCU supercomplex

22

23

24 **Abstract**

25 The mitochondrial  $\text{Ca}^{2+}$  uniporter (MCU) supercomplex is essential for mitochondrial  $\text{Ca}^{2+}$  uptake.  
26 Here, we present high-resolution cryo-EM structures of human MCU-EMRE supercomplex (MES,  
27 3.41 Å) and MCU-EMRE-MICU1-MICU2 supercomplex (MEMMS, 3.64 Å). MES adopts a V-  
28 shaped dimer architecture comprising two hetero-octamers, and a pair of MICU1-MICU2 hetero-  
29 dimers form a bridge across the two halves of MES to constitute an O-shaped architecture of MEMMS.  
30 The MES and MEMMS pore profiles are almost identical, with  $\text{Ca}^{2+}$  in the selectivity filters and no  
31 obstructions, indicating both channels are conductive. Contrary to the current model in which MICUs  
32 block the MCU pore, MICU1-MICU2 dimers are located on the periphery of the MCU pores and do  
33 not occlude them. However, MICU1-MICU2 dimers may modulate MCU gating by affecting the  
34 matrix gate through the EMRE lever.

35

36

37

38

## 39 **Introduction**

40 Mitochondrial  $\text{Ca}^{2+}$  homeostasis regulates energy production, cell division, and cell death. The basic  
41 properties of mitochondrial  $\text{Ca}^{2+}$  uptake have been firmly established (1-4). The  $\text{Ca}^{2+}$  influx is  
42 mediated by MCU, driven by membrane potential and using a uniporter mechanism ( $\text{Ca}^{2+}$  transport is  
43 not coupled to transport of any other ion) (5). Patch-clamp analysis of MCU currents demonstrated  
44 that MCU is a channel with exceptionally high  $\text{Ca}^{2+}$  selectivity (6). Further,  $\text{Ca}^{2+}$  efflux is known to  
45 involve two pathways:  $\text{H}^+/\text{Ca}^{2+}$  exchange (7) and  $\text{Na}^+/\text{Ca}^{2+}$  exchange (8). The homeostasis of  
46 mitochondrial  $\text{Ca}^{2+}$  must be exquisitely regulated to prevent wastage of energy from bidirectional  $\text{Ca}^{2+}$   
47 flux (9-11).

48 In 2010, an RNA silencing study highlighted that MICU1 (mitochondrial  $\text{Ca}^{2+}$  uptake 1) represents the  
49 founding member of a set of proteins required for high-capacity mitochondrial  $\text{Ca}^{2+}$  uptake (12). In  
50 2011, two groups independently reported the membrane protein MCU and proposed it as the pore-  
51 forming element of the long-sought mitochondrial  $\text{Ca}^{2+}$  uniporter (13, 14), which was confirmed later  
52 using whole-mitoplast voltage-clamping (15). In 2012, a paralog of MICU1, MICU2 (mitochondrial  
53  $\text{Ca}^{2+}$  uptake 2), was shown to cooperatively regulate  $\text{Ca}^{2+}$  uptake with MICU1 (16). In 2013, a genetic  
54 study led to the characterization of MCUB (mitochondrial  $\text{Ca}^{2+}$  uniporter b), a vertebrate specific  
55 protein sharing ~ 50% sequence identity and the same membrane topology with MCU (17). Also in  
56 2013, a previously uncharacterized protein, EMRE (essential MCU regulator), which was shown to be  
57 essential for  $\text{Ca}^{2+}$  uptake in metazoa, was affinity-purified from human cells in complex with MCU  
58 (18).

59 Even in the absence of structural data on the MCU complex, mitochondrial  $\text{Ca}^{2+}$  uptake and its  
60 regulation in mammals has been assumed to rely on a complex comprising MCU, EMRE, MICU1,  
61 and MICU2 (10, 19-21). Previous models generally believe that MICU1 and MICU2 form a cap to  
62 occlude the MCU channel in low  $[\text{Ca}^{2+}]$  conditions, and when  $[\text{Ca}^{2+}]$  is elevated, through  
63 conformational changes of the EF hands in these two regulators, they will depart from the MCU/EMRE  
64 pore to allow  $\text{Ca}^{2+}$  permeation (22, 23).

65 Several MCU structures from fungi and an MCU-EMRE supercomplex (MES) structure from human  
66 have been solved lately (24-28), however, no intact structure of the MCU-EMRE-MICU1-MICU2  
67 supercomplex (MEMMS) has been reported. In the present study, after extensive optimization of

68 expression and purification steps, we obtained the high-resolution cryo-EM structures of the human  
69 MES and MEMMS. The pore profiles of both structures are almost identical.  $\text{Ca}^{2+}$  is bound in the  
70 selectivity filter of both MES and MEMMS, and there is no pore obstruction in either of the structures.  
71 Therefore, we propose that both structures are in a conductive conformation. The MEMMS structure  
72 clearly demonstrates how MICU1 and MICU2 bind to MES. The two regulators apparently do not  
73 occlude the MCU channel. Instead, they form a bridge linking the two MCU pores through direct  
74 interactions with EMRE subunits. This finding is in striking contrast to the generally accepted model  
75 in which MICUs cap and occlude the MCU channel on its cytosolic side. The accompanying paper  
76 also demonstrates that MICU subunits do not occlude the MCU pore. Rather, MICUs potentiate MCU  
77 activity as cytosolic  $[\text{Ca}^{2+}]$  is elevated (Garg et al, accompanying manuscript).

78

## 79 **Results**

### 80 **Structure determination**

81 The human MCU supercomplex was expressed in HEK 293F cells containing BacMam viruses for  
82 each of the genes *mcu*, *mcub*, *micu1*, *micu2*, and *emre*. After extensive optimization of reactants, we  
83 obtained an abundant amount of high quality MES and MEMMS protein samples, pulled-down by the  
84 C-terminally Strep-tagged EMRE in purification buffer with or without (EGTA)  $\text{Ca}^{2+}$ , respectively.  
85 These samples (MES and MEMMS) were used to pool the grids for cryo-EM analyses (fig. S1, A and  
86 B, and Methods). Images were recorded with a combination of a Titan Krios Cryo-EM and a K2 direct  
87 electron detector in super-resolution mode (fig. S1, C and D). After extensive 2D and 3D classification  
88 of particles, a subset of particles was subjected to refinement, resulting in a 3D density map of MES  
89 at an overall resolution of 3.41 Å, and a density map of MEMMS at an overall resolution of 3.64 Å  
90 (Gold-standard FSC 0.143 criterion) (29, 30) (fig. S1, E and F, and fig. S2). Further subregion  
91 refinement with two different masks for the helical region and the N-terminal region of MES improved  
92 the resolution for these two regions to around 3.27 Å. Subregion refinement with masks for MICU1-  
93 MICU2, the helical region, and the N-terminal region of MEMMS further improved the resolution for  
94 these regions to 3.71, 3.30, and 3.39 Å, respectively (Gold-standard FSC 0.143 criterion) (29, 30) (fig.  
95 S2).

96 We subsequently obtained our high-resolution human MES and MEMMS structures based on a  
97 combination of structure docking and *de novo* modeling (31, 32). The well-resolved density maps  
98 allowed us to build structural models for almost all residues with their side chains (Fig. 1, A and B,  
99 and figs. S3 and S4). However, three sets of densities were not optimal for model building. The first  
100 is the density for the highly conserved C-terminal poly-D tail (EMRE<sup>101-107</sup>: EDDDDDD) of EMRE  
101 (18), the second is the conserved N-terminal poly-K (MICU1<sup>99-102</sup>: KKKK) of MICU1, and the third  
102 is the density for the conserved C-terminal helix (around 450-470) of MICU1 (fig. S5, A and B). The  
103 ambiguity of these densities might be owing to the double strep tag we added, and the flexibility of  
104 these regions.

105 Despite our inclusion of a total of 5 transgenes in HEK 293F cells, the final structure only contains  
106 two kinds of subunits (MCU and EMRE) when the purification buffer contains Ca<sup>2+</sup>, and four kinds  
107 of subunits (MCU, EMRE, MICU1, and MICU2) when the expression and purification procedure is  
108 deprived of Ca<sup>2+</sup> by adding EGTA. Within the MEMMS structure, we detected 2 Ca<sup>2+</sup> ions, 8  
109 cardiolipins (CDLs), and 16 phosphatidylcholines (PLXs). There were additional four Ca<sup>2+</sup> ions within  
110 the MES structure (Fig. 1, A and B, and fig. S3, E and F).

111

## 112 **Overall structure of human MEMMS**

113 Unlike previous fungal MCU homo-tetrameric structures (24-27), human MES forms a V-shaped  
114 structure comprising two hetero-octamers in C2 symmetry, in agreement with the human MES  
115 structure reported by Jiang's team (28) (fig. S4A). Interestingly, human MEMMS forms an O-shaped  
116 ring, with a pair of MICU1-MICU2 heterodimer appearing like a bridge across the MES at the  
117 intermembrane space (IMS) side (Fig. 1A, and fig. S4B). When MICU1-FLAG plasmid was  
118 transfected into MICU2 KO HEK 293T cells, MICU1-FLAG was still able to co-precipitate with MCU,  
119 indicating that MICU2 is not required for interactions between MICU1 and MCU, which is consistent  
120 with our structure (Fig. 1C).

121 Alignment of MES and MEMMS shows that the helical region of these two complexes can perfectly  
122 match each other (fig. S4, D and E). Thus, in the later paragraphs, we mainly describe the structural  
123 features of MEMMS. MEMMS has a molecular weight of about 480 kDa and an overall dimension of

124 210 Å x 190 Å (Fig. 1A). The overall structure adopts the shape similar to that of two “goldfish,” as  
125 if glued together at both their heads (MICU1/MICU2 dimer) and tails (NTD of MCU), with the two  
126 transmembrane domains (TMDs) of MCU forming an angle reminiscent of ATP synthase dimers,  
127 located at cristae ridges of the inner mitochondrial membrane (33-35) (Fig. 1A).

128 The MCU subunit comprises three structural domains: the TMD, the coiled-coil domain (CCD), and  
129 the NTD (Fig. 1B). The TMD of MCU is known to be responsible for Ca<sup>2+</sup> selectivity and conduction,  
130 and each MCU subunit contributes two transmembrane helices to the TMD: TM1 and TM2. Together,  
131 the four TM2s, which contain the highly conserved signature sequence (WDIMEP) (13, 14, 17), form  
132 the inner wall of the Ca<sup>2+</sup> channel, and the four TM1s form the exterior wall of the channel. On the  
133 IMS side, TM1 and TM2 are linked by a short loop, forming a hairpin structure (fig. S6A). TM1 and  
134 TM2 are not parallel; instead, an obvious gap is formed between the two helices on the matrix side,  
135 which is filled by one PLX and one CDL molecules (Fig. 1B and fig. S6A).

136 The CCD and NTD of MCU are located in the mitochondrial matrix. The CCD of each MCU subunit  
137 comprises three  $\alpha$ -helices: an exceptionally long and obviously bent helix (cc1), a lateral helix (cc2),  
138 and a short helix (cc3). Helix cc1 is extended from TM1, forming the coiled-coil structure in CCD  
139 with helix cc3. Helix cc2 links TM2 and cc3 (fig. S6A). The CCDs from human and fungi (24-27)  
140 both appear as “swollen bellies”. However, the human CCD is considerably larger than fungal ones.  
141 The NTDs of the four MCU subunits align in a configuration resembling that of bent “goldfish tails”.  
142 The NTD is connected to the cc1 via the linking helix  $\alpha$ 1, and the four  $\alpha$ 1 helices of each MCU subunits  
143 stably interact with each other, forming a four-helix bundle that stabilizes the MCU tetramers (fig.  
144 S6B).

145

#### 146 **EMRE encages MCU and directly interacts with MICU1**

147 EMRE is a small protein, containing only 107 residues after translation, and its 47 N-terminal residues  
148 are cut off after its transport into mitochondria (18). EMRE has been known to be required for  
149 mitochondrial Ca<sup>2+</sup> uptake in human cells (18, 36). Within the membrane, four EMREs, four CDLs,  
150 four horizontal PLXs, and four vertical PLXs form a cage. They bundle up the four MCU subunits,

151 thereby stabilizing and likely supporting a functional conformation of the Ca<sup>2+</sup> channel (Fig. 2, A and  
152 B).

153 In our structure, the N-terminal (residues 48-65) and C-terminal (residues 97-107) residues of EMRE  
154 appear as loops, while its middle residues (residues 66-96) adopt the configuration of a single  $\alpha$ -helix.  
155 This middle EMRE  $\alpha$ -helix locates within the membrane and is tilted by 37° relative to the membrane  
156 plane normal, such that each EMRE subunit interacts with two neighboring MCU subunits (Fig. 2, B  
157 and C). The N-terminal loop of EMRE protrudes into the particularly large chamber of CCD, forming  
158 rich hydrogen bonds with cc2 and cc3, and even with a CDL molecule (Fig. 2C).

159 The negatively charged C-terminal loops of EMRE protrude into the IMS and are responsible for direct  
160 interaction with MICU1. The structure shows no direct interaction between MICU1 and MCU. The  
161 positively charged N-terminal poly-K (residues 99-102) region of MICU1 and the negatively charged  
162 C-terminal tail (residues 93-107) of EMRE are in close proximity to each other, as shown by clear  
163 interactions between MICU1 Gly<sup>105</sup>, Phe<sup>106</sup> and EMRE Glu<sup>93</sup>, Glu<sup>101</sup> (Fig. 2D), consistent with  
164 previous functional study which has detected interactions between these two oppositely charged tails  
165 (37). To confirm the linking role of MICU1 poly-K region, we deleted these amino acids and  
166 subsequently found that MICU1- $\Delta$ K cannot co-precipitate with MCU (Fig. 2E). In addition, we found  
167 Ser<sup>339</sup>, Lys<sup>340</sup>, Lys<sup>341</sup> sequence in MICU1 C-lobe that can also interact with the negatively charged tail  
168 of another adjacent EMRE (Fig. 2D). So, we introduced a triple mutation (S339E, K340E, K341E) in  
169 MICU1 and found that the triple mutant also has reduced interaction with MCU. Finally, we truncated  
170 the negatively charged tail (residues 93-107) of EMRE, and the Ca<sup>2+</sup> uptake rate of MCU complex in  
171 high [Ca<sup>2+</sup>] condition was reduced about twofold (Fig. 2E). These results indicate that the N-terminal  
172 domain and Ser<sup>339</sup>, Lys<sup>340</sup>, Lys<sup>341</sup> sequence of MICU1 are important for its recruitment onto  
173 MCU/EMRE complex, most probably through interactions with the negatively charged C-terminal tail  
174 of EMRE. Furthermore, the interaction between the MCU/EMRE pore and the MICU1/MICU2 dimer  
175 appears to have a positive effect on the Ca<sup>2+</sup>-transport activity.

176

177 **MICU1 and MICU2 do not occlude the MCU pore**

178 MEMMS are linked at the IMS side via MICU1 and MICU2, and at the matrix side via MCU NTDs  
179 (Fig. 1A). Each MICU1 and MICU2 subunit contains four EF-hands, of which two are capable of  
180 binding  $\text{Ca}^{2+}$  ions (38). However, in our structure, no  $\text{Ca}^{2+}$  is bound to MICU1 or MICU2 subunits,  
181 which can be attributed to the deprivation of  $\text{Ca}^{2+}$  by EGTA during expression and purification (Fig.  
182 3A). Alignment of MICU1 and MICU2 shows that they have very similar core structures (N-lobe and  
183 C-lobe), but their N-terminal domains and C-terminal helices are different (Fig. 3A). The N-terminal  
184 domain and Ser<sup>339</sup>, Lys<sup>340</sup>, Lys<sup>341</sup> sequence of MICU1 can interact with EMRE as discussed above.  
185 MICU1 and MICU2 form a hetero-dimer in a previously reported ‘face-to-face’ pattern, while the two  
186 MICU2 subunits interact in a ‘back-to-back’ pattern (39). Consequently, the N and C lobes of MICU1  
187 and MICU2 subunits are arranged in an alternative pattern to link two MCU channels (Fig. 3, B and  
188 C).

189 Previous models suggested that MICU1/2 dimer occludes the MCU pore (22, 23, 38, 39) at low  
190 cytosolic [ $\text{Ca}^{2+}$ ], which is obviously not the case as shown by the MEMMS structure (obtained in the  
191 presence of EGTA). The accompanying manuscript also reports that MICU subunits do not occlude  
192 the MCU channel in low cytosolic [ $\text{Ca}^{2+}$ ], using direct patch-clamp analysis of MCU currents (Garg  
193 et al, the accompanying manuscript)

194 In addition to the EMRE/MICU1 interactions, the C-terminal helices of both MICU1 and MICU2 also  
195 contribute to MICU localization onto the inner membrane (fig. S7). In the MEMMS structure, although  
196 it's difficult to analyze the detailed interactions between these two helices due to the vague local density,  
197 one can still appreciate that the two helices are parallel to each other at the surface of inner  
198 mitochondrial membrane (Fig. 2D and fig. S3G). The C-terminal helices of MICU2 have hydrophobic  
199 residues partially buried in the inner membrane, while the positively charged residues point parallel to  
200 the membrane, interacting with the negatively charged phosphates of the membrane (fig. S7). This is  
201 in agreement with the previous reports that MICU1 and MICU2 directly interact with the lipid  
202 membrane (12, 40, 41). Previous reports also show that the C-terminal helix is important for the  
203 interaction of MICU1 with MES (42, 43). Accordingly, deletion of MICU1 C-terminal helix  
204 significantly weakened the binding of MICU1 to MCU, and even lowered  $\text{Ca}^{2+}$  uptake activity (42,  
205 43). Although the density map of this area is not clear enough for deciphering detailed interactions, we



206 find that MICU1 C-terminal helix is in close vicinity of the EMRE helix (Fig. 2D). In a previous study,  
207 Co-IP assay showed that MICU2  $\Delta$ C could not interact with MICU1 or MCU (38). These findings are  
208 consistent with the MEMMS structure, in which the C-terminal helices act as an anchor to maintain  
209 MICU1 and MICU2 near to each other at the surface of inner mitochondrial membrane.

210 In the MES structure solved under high  $[Ca^{2+}]$ , no electron density can be associated with MICU1 or  
211 MICU2. We consider that the loss of MICUs is an artifact of the purification procedure. Since the  
212 membrane was solubilized in detergent, the C-terminal helix could lose its attachment with the  
213 membrane. In addition, when EF hands are occupied by  $Ca^{2+}$ , conformational change of MICUs likely  
214 makes them more vulnerable to dissociation, leading to loss of MICU1 and MICU2 in the MES  
215 structure.  $Ca^{2+}$  uptake in high  $[Ca^{2+}]$  condition was impaired in MICU1 $\Delta$ C cells (43), which also  
216 suggests MICU1 is very likely attached to MCU in high  $[Ca^{2+}]$ . In fact, in a previous report, interaction  
217 between MCU and MICU1 in high  $[Ca^{2+}]$  was detected through co-IP (43).

218 In the matrix, the four NTDs align in a bent “fish-tail” configuration (fig. S8A). Note that this fish-tail  
219 alignment is in agreement with the previously reported MCU NTD crystal structure from human (44,  
220 45), cryo-EM structure of the zebrafish MCU (25), and the recently published MES structure from  
221 human (28), but is quite distinct from the MCU structures from fungi (24-27) (fig. S8B). At the  
222 interface between the two fish-tails in MEMMS, three NTD pairs are tightly connected, while one set  
223 of NTDs are spared, which is the same case in MES (fig. S8C). Interestingly, the interaction patterns  
224 are not identical for all three pairs, and the only polar interaction that occurs commonly for all three  
225 pairs is between Asp<sup>123</sup> and Arg<sup>93</sup>. We mutated Asp<sup>123</sup> to Arg, or Arg<sup>93</sup> to Asp, respectively, and found  
226 that both mutations have negligible influence on the  $Ca^{2+}$  uptake rate (fig. S8D). Thus, the other  
227 interactions between the three NTD pairs could still hold the two MCU channels together *in vivo* after  
228 these mutations.

229

### 230 **Phospholipids and the matrix gate**

231 In both MES and MEMMS structures, one CDL and one horizontal PLX molecules inserts into the  
232 gap between TM1 and TM2 of each MCU subunit, and another vertical PLX molecule stands alongside  
233 each TM2. Notably, most of the lipid chains of the CDL and vertical PLX in our structure are parallel

234 to the helices of TMD, while the lipid chains of the horizontal PLX are positioned horizontally in the  
235 membrane (Fig. 4A and fig. S6A). In a previous fungal structure (24), a horizontal PLX molecule was  
236 also found in the wall of the MCU channel. However, when we compare these two structures, the  
237 position of these two PLX molecules does not match.

238 In addition to interacting with TM1, TM2, and cc2 of one MCU subunit, each CDL molecule also  
239 interacts tightly with the neighboring EMRE. Specifically, a highly conserved residue of MCU cc2,  
240 Arg<sup>297</sup>, can form stable hydrogen bonds with both the phosphate group of CDL and the main chain  
241 oxygen of Val<sup>61</sup> in EMRE (Fig. 4A), indicating Arg<sup>297</sup> could be a critical residue for MCU regulation.  
242 This interaction (MCU- Arg<sup>297</sup> to EMRE-Val<sup>61</sup>) is also observed in a previous human MES structure  
243 (28), however, interacting phospholipids were not detected. In the same report, authors truncated the  
244 N-terminal loop of EMRE, residue by residue until Lys<sup>59</sup>, and found that the Ca<sup>2+</sup> uptake activity of  
245 MCU decreased gradually. Further truncation resulted in no EMRE expression, so the interaction  
246 between Arg<sup>297</sup> and Val<sup>61</sup> was not tested (28). To supplement, we mutated Arg<sup>297</sup> to Asp, and strikingly  
247 this mutation completely abolished the Ca<sup>2+</sup> uptake via MCU (Fig. 4B). Similarly, P60A mutation in  
248 EMRE, just next to the MCU-Arg<sup>297</sup>, can also totally abolish MCU activity (46), adding importance  
249 to correct interactions between cc2 and EMRE.

250 It has been proposed that cc2 and cc3 form a luminal gate near the matrix side of MCU that is  
251 maintained in an open conformation via its interaction with EMRE (28, 47). The previous human MES  
252 structure and our MES and MEMMS structures all detected stable hydrogen bonds between EMRE N-  
253 terminal loop and MCU cc2-cc3 (Fig. 4A), however, we also found several phospholipids filling the  
254 gaps between helices from MCU and EMRE. These phospholipids could stabilize the gaps and provide  
255 elasticity to this region, enabling the gate to be opened by EMRE (Fig. 4C). The MCU-R297D  
256 mutation might dissociate the bound CDL and disrupt the attachment of EMRE on cc2. This would  
257 leave cc2 free to roll aside and possibly push the negatively charged Glu<sup>288</sup> and Glu<sup>293</sup> residues of  
258 MCU inward, thus making the channel non-conducting. We observed multiple hydrophobic  
259 interactions between cc3 and cc1, which might help to achieve a correct position of the gate-forming  
260 cc2 (Fig. 4A and fig. S6A). The amino acid residues participating in these hydrophobic interactions  
261 are highly conserved and were shown to be indispensable for MCU activity (47). Besides, the

262 negatively charged polar head of the horizontal PLX is also very likely involved in forming the gate,  
263 because their conformation is quite stable and they protrude deeply into the channel (Fig. 4C).

264

### 265 **The MCU pore and its regulation by MICU1/2**

266 We detected three  $\text{Ca}^{2+}$  ions in each pore of the MES structure (using buffers containing  $\text{Ca}^{2+}$ ), and  
267 only a single  $\text{Ca}^{2+}$  ion in each pore in the MEMMS structure (using buffers deprived of  $\text{Ca}^{2+}$  by 0.1 mM  
268 EGTA) (fig. S3, E and F). These  $\text{Ca}^{2+}$  ions are surrounded by the WDXXEP signature sequence  
269 (WDIMEP in human) adjacent to IMS, which was proposed to serve as a selectivity filter and discussed  
270 in detail previously (24-28). Four Asp<sup>261</sup> residues form the first  $\text{Ca}^{2+}$  binding site, four Glu<sup>264</sup> residues  
271 form the second, while four Tyr<sup>268</sup> residues surround the third  $\text{Ca}^{2+}$  in MES (fig. S9, A and B). In the  
272 MEMMS structure, a single  $\text{Ca}^{2+}$  ion was detected at the high-affinity Glu<sup>264</sup> site, the narrowest site in  
273 the pore (fig. S9C). The Glu<sup>264</sup> site is likely the same site in the MCU pore that was previously reported  
274 to bind cytosolic  $\text{Ca}^{2+}$  with  $K_d \leq 2$  nM (6), and thus it should always be occupied by  $\text{Ca}^{2+}$  under  
275 physiological conditions. The lowest cytosolic [ $\text{Ca}^{2+}$ ] at which  $\text{Ca}^{2+}$  permeation through the MCU pore  
276 can occur is ~100 nM (22, 48, 49). At this concentration,  $\text{Ca}^{2+}$  should start binding to the Asp<sup>261</sup> site,  
277 which reduces affinity for  $\text{Ca}^{2+}$  binding at Glu<sup>264</sup> and makes permeation possible. Our MEMMS  
278 structure does not have  $\text{Ca}^{2+}$  at the Asp<sup>261</sup> site, and [ $\text{Ca}^{2+}$ ] in which MEMMS structure was determined  
279 was below 100 nM. This is expected, as the sample was washed multiple times with buffers containing  
280 0.1 mM EGTA (see Methods). The estimated  $K_d$  for  $\text{Ca}^{2+}$  binding of MICU1/2 dimer is ~600 nM (50),  
281 therefore it is also expected that the EF hands of MICU subunits in our MEMMS structure are  $\text{Ca}^{2+}$ -  
282 free.

283 In MEMMS, MICU1/2 drag the two MCU tetramers closer to each other as compared to MES (fig.  
284 S4E). However, the pores of the MES and MEMMS structures are similar at both the selectivity filter  
285 and the putative matrix gate and show no possible obstructions for  $\text{Ca}^{2+}$  permeation (Fig. 5, A to C).  
286 This indicates that the binding of MICU1/2, does not occlude or obstruct the MCU pore. This  
287 conclusion is in a striking contrast to the currently accepted model of MICU1/MICU2 dimer (22, 23,  
288 38, 39). However, our observations are consistent with the accompanying manuscript, in which authors  
289 also found that in low [ $\text{Ca}^{2+}$ ] conditions, the MCU pore is open and conducts similar currents in both

290 the MICU1-deficient MCU complex (MES) and wide type MCU complex (MEMMS) (Garg et al, the  
291 accompanying manuscript).

292 With the four EF-hands of MICU1/2 dimers, MICU1/2 can sense the local cytosolic  $[Ca^{2+}]$  in the  
293 vicinity of the MCU pore and undergo conformational change upon  $Ca^{2+}$  binding. The accompanying  
294 manuscript by Garg et al., demonstrates that  $Ca^{2+}$  binding to MICU1/2 potentiates  $Ca^{2+}$  permeation  
295 through the MCU pore by increasing the probability of its open state. Our MEMMS structure and the  
296 previously proposed MCU gating mechanism (28) could explain this functional behavior of the MCU  
297 complex. Specifically, we hypothesize that after  $Ca^{2+}$  binding to their EF-hands, a conformational  
298 change in MICU1/2 dimers exerts a force upon EMRE and the elastic MCU matrix gate, thus  
299 increasing its probability of open state.

300

## 301 Discussion

302 In conclusion, here we report the first structure of intact MCU supercomplex as a 20-subunit O-shaped  
303 dimer of hetero-decamers, with auxiliary MICU1 and MICU2 subunits attached. We discovered that a  
304 pair of MICU1-MICU2 hetero-dimers link the two MCU channels, which is obviously different from  
305 previous models that assume MICU1/2 oligomers to ride across the MCU pore and occlude it in low  
306 cytosolic  $[Ca^{2+}]$ . We found that MICU1 does not directly contact MCU, but can attach onto the MCU  
307 complex through interaction with EMRE, indicating that a critical function of EMRE is to couple the  
308  $Ca^{2+}$ -sensing MICUs with the MCU channel. We propose that upon  $Ca^{2+}$  binding to their EF hands,  
309 MICU1/2 exert a pulling force upon EMRE to stabilize the open state of the MCU matrix gate. These  
310 results are in agreement with the accompanying paper showing that  $Ca^{2+}$ -free MICUs have no effect  
311 on ion permeation via MCU, and MICUs potentiate MCU function as cytosolic  $Ca^{2+}$  binds to their EF  
312 hands (Garg et al, the accompanying manuscript).

313 As shown in the MEMMS structure, two MICU1 and two MICU2 subunits form a straight line between  
314 the two MCU channels. EMRE could function like a lever, with its C-terminal loop interacting with  
315 MICU1, its central helix anchored to TM1 of MCU as the pivot, and its N-terminal loop supporting  
316 MCU CCD. The interaction between MCU Arg<sup>297</sup> and EMRE Val<sup>61</sup> is the force bearing point of cc2  
317 (R297D mutation makes the MCU channel nonfunctional). In addition, we detected rich phospholipids

318 around the MCU matrix gate (formed by the loop between TM2 and cc2), which could provide  
319 elasticity to this region. After Ca<sup>2+</sup> binding, conformational change of MICU1/2 could exert a pull on  
320 the EMRE N-terminal, and cause the enlargement (or stabilization of the open state) of the MCU  
321 matrix gate (Fig. 5E).

322 We compared our MES structure with previous fungal MCU structures to find that human MES has a  
323 swollen CCD enlarged by EMRE (fig. S10). This curvature is very likely facilitated by Pro<sup>216</sup> of cc1,  
324 which is conserved in mammals but absent in fungi (fig. S10E). The cc2s in reported fungal MCU  
325 structures are not well resolved, indicating that their position is flexible possibly due to lack of EMRE.  
326 The curvature of cc1 and the tight cc1-cc3 interaction could probably elevate the position of cc2 and  
327 close the gate if no EMRE is bound. Consequently, we propose that because fungal MCU does not  
328 have an elevated cc2, it does not require EMRE to maintain an open position. In contrast, EMRE is  
329 indispensable for human MCU because its cc2 is supported by EMRE N-terminal loop.

330

### 331 **References and notes**

- 332 1. M. Gemba, E. Nakatani, M. Teramoto, S. Nakano, Effect of cisplatin on calcium uptake by rat kidney cortical  
333 mitochondria. *Toxicol Lett* **38**, 291-297 (1987).
- 334 2. F. R. Mraz, Calcium and strontium uptake by rat liver and kidney mitochondria. *Proc Soc Exp Biol Med*  
335 **111**, 429-431 (1962).
- 336 3. H. F. Deluca, G. W. Engstrom, Calcium uptake by rat kidney mitochondria. *Proc Natl Acad Sci U S A* **47**,  
337 1744-1750 (1961).
- 338 4. T. E. Gunter, D. R. Pfeiffer, Mechanisms by Which Mitochondria Transport Calcium. *Am J Physiol* **258**,  
339 C755-C786 (1990).
- 340 5. F. D. Vasington, J. V. Murphy, Ca<sup>++</sup> Uptake by Rat Kidney Mitochondria and Its Dependence on Respiration  
341 and Phosphorylation. *J Biol Chem* **237**, 2670-& (1962).
- 342 6. Y. Kirichok, G. Krapivinsky, D. E. Clapham, The mitochondrial calcium uniporter is a highly selective ion  
343 channel. *Nature* **427**, 360-364 (2004).
- 344 7. D. W. Jiang, L. L. Zhao, D. E. Clapham, Genome-Wide RNAi Screen Identifies Letm1 as a Mitochondrial  
345 Ca<sup>2+</sup>/H<sup>+</sup> Antiporter. *Science* **326**, 144-147 (2009).
- 346 8. R. Palty *et al.*, NCLX is an essential component of mitochondrial Na<sup>+</sup>/Ca<sup>2+</sup> exchange. *P Natl Acad Sci USA*  
347 **107**, 436-441 (2010).
- 348 9. K. J. Kamer, V. K. Mootha, The molecular era of the mitochondrial calcium uniporter. *Nat Rev Mol Cell Biol*  
349 **16**, 545-553 (2015).
- 350 10. D. De Stefani, R. Rizzuto, T. Pozzan, Enjoy the Trip: Calcium in Mitochondria Back and Forth. *Annu Rev*  
351 *Biochem* **85**, 161-192 (2016).

- 352 11. M. Patron *et al.*, The mitochondrial calcium uniporter (MCU): molecular identity and physiological roles. *J*  
353 *Biol Chem* **288**, 10750-10758 (2013).
- 354 12. F. Perocchi *et al.*, MICU1 encodes a mitochondrial EF hand protein required for Ca<sup>2+</sup> uptake. *Nature* **467**,  
355 291-U267 (2010).
- 356 13. J. M. Baughman *et al.*, Integrative genomics identifies MCU as an essential component of the mitochondrial  
357 calcium uniporter. *Nature* **476**, 341-U111 (2011).
- 358 14. D. De Stefani, A. Raffaello, E. Teardo, I. Szabo, R. Rizzuto, A forty-kilodalton protein of the inner membrane  
359 is the mitochondrial calcium uniporter. *Nature* **476**, 336-U104 (2011).
- 360 15. D. Chaudhuri, Y. Sancak, V. K. Mootha, D. E. Clapham, MCU encodes the pore conducting mitochondrial  
361 calcium currents. *Elife* **2**, e00704 (2013).
- 362 16. M. Plovanich *et al.*, MICU2, a Paralog of MICU1, Resides within the Mitochondrial Uniporter Complex to  
363 Regulate Calcium Handling. *Plos One* **8**, (2013).
- 364 17. A. Raffaello *et al.*, The mitochondrial calcium uniporter is a multimer that can include a dominant-  
365 negative pore-forming subunit. *EMBO J* **32**, 2362-2376 (2013).
- 366 18. Y. Sancak *et al.*, EMRE Is an Essential Component of the Mitochondrial Calcium Uniporter Complex.  
367 *Science* **342**, 1379-1382 (2013).
- 368 19. N. Demaurex, M. Rosselin, Redox Control of Mitochondrial Calcium Uptake. *Mol Cell* **65**, 961-962 (2017).
- 369 20. M. Ahuja, S. Muallem, The gatekeepers of mitochondrial calcium influx: MICU1 and MICU2. *Embo Rep* **15**,  
370 205-206 (2014).
- 371 21. A. G. Bick *et al.*, Cardiovascular homeostasis dependence on MICU2, a regulatory subunit of the  
372 mitochondrial calcium uniporter. *Proc Natl Acad Sci U S A* **114**, E9096-E9104 (2017).
- 373 22. M. Paillard *et al.*, MICU1 Interacts with the D-Ring of the MCU Pore to Control Its Ca(2+) Flux and  
374 Sensitivity to Ru360. *Mol Cell* **72**, 778-785 e773 (2018).
- 375 23. C. B. Phillips, C. W. Tsai, M. F. Tsai, The conserved aspartate ring of MCU mediates MICU1 binding and  
376 regulation in the mitochondrial calcium uniporter complex. *Elife* **8**, (2019).
- 377 24. R. Baradaran, C. Wang, A. F. Siliciano, S. B. Long, Cryo-EM structures of fungal and metazoan  
378 mitochondrial calcium uniporters. *Nature* **559**, 580-584 (2018).
- 379 25. C. Fan *et al.*, X-ray and cryo-EM structures of the mitochondrial calcium uniporter. *Nature* **559**, 575-579  
380 (2018).
- 381 26. N. X. Nguyen *et al.*, Cryo-EM structure of a fungal mitochondrial calcium uniporter. *Nature* **559**, 570-574  
382 (2018).
- 383 27. J. Yoo *et al.*, Cryo-EM structure of a mitochondrial calcium uniporter. *Science* **361**, 506-+ (2018).
- 384 28. Y. Wang *et al.*, Structural Mechanism of EMRE-Dependent Gating of the Human Mitochondrial Calcium  
385 Uniporter. *Cell* **177**, 1252-1261 e1213 (2019).
- 386 29. W. Du *et al.*, Kinesin 1 Drives Autolysosome Tubulation. *Dev Cell* **37**, 326-336 (2016).
- 387 30. J. Zivanov *et al.*, New tools for automated high-resolution cryo-EM structure determination in RELION-3.  
388 *Elife* **7**, (2018).
- 389 31. P. Emsley, B. Lohkamp, W. G. Scott, K. Cowtan, Features and development of Coot. *Acta Crystallogr D Biol*  
390 *Crystallogr* **66**, 486-501 (2010).
- 391 32. P. D. Adams *et al.*, PHENIX: a comprehensive Python-based system for macromolecular structure solution.  
392 *Acta Crystallogr D Biol Crystallogr* **66**, 213-221 (2010).

- 393 33. S. Cogliati, J. A. Enriquez, L. Scorrano, Mitochondrial Cristae: Where Beauty Meets Functionality. *Trends*  
394 *Biochem Sci* **41**, 261-273 (2016).
- 395 34. J. Habersetzer *et al.*, ATP synthase oligomerization: from the enzyme models to the mitochondrial  
396 morphology. *Int J Biochem Cell Biol* **45**, 99-105 (2013).
- 397 35. R. Guo, S. Zong, M. Wu, J. Gu, M. Yang, Architecture of Human Mitochondrial Respiratory Megacomplex  
398 I2III2IV2. *Cell* **170**, 1247-1257 e1212 (2017).
- 399 36. E. Kovacs-Bogdan *et al.*, Reconstitution of the mitochondrial calcium uniporter in yeast. *Proc Natl Acad Sci*  
400 *U S A* **111**, 8985-8990 (2014).
- 401 37. M. F. Tsai *et al.*, Dual functions of a small regulatory subunit in the mitochondrial calcium uniporter  
402 complex. *Elife* **5**, (2016).
- 403 38. K. J. Kamer, W. Jiang, V. K. Kaushik, V. K. Mootha, Z. Grabarek, Crystal structure of MICU2 and comparison  
404 with MICU1 reveal insights into the uniporter gating mechanism. *Proc Natl Acad Sci U S A* **116**, 3546-3555  
405 (2019).
- 406 39. Y. Xing *et al.*, Dimerization of MICU Proteins Controls Ca(2+) Influx through the Mitochondrial Ca(2+)  
407 Uniporter. *Cell Rep* **26**, 1203-1212 e1204 (2019).
- 408 40. K. J. Kamer, Z. Grabarek, V. K. Mootha, High-affinity cooperative Ca(2+) binding by MICU1-MICU2 serves  
409 as an on-off switch for the uniporter. *Embo Rep* **18**, 1397-1411 (2017).
- 410 41. G. Csordas *et al.*, MICU1 Controls Both the Threshold and Cooperative Activation of the Mitochondrial  
411 Ca<sup>2+</sup> Uniporter. *Cell Metab* **17**, 976-987 (2013).
- 412 42. K. J. Kamer, V. K. Mootha, MICU1 and MICU2 play nonredundant roles in the regulation of the  
413 mitochondrial calcium uniporter. *Embo Rep* **15**, 299-307 (2014).
- 414 43. L. Wang *et al.*, Structural and mechanistic insights into MICU1 regulation of mitochondrial calcium uptake.  
415 *EMBO J* **33**, 594-604 (2014).
- 416 44. Y. Lee *et al.*, Structure and function of the N-terminal domain of the human mitochondrial calcium  
417 uniporter. *Embo Rep* **16**, 1318-1333 (2015).
- 418 45. S. K. Lee *et al.*, Structural Insights into Mitochondrial Calcium Uniporter Regulation by Divalent Cations.  
419 *Cell Chem Biol* **23**, 1157-1169 (2016).
- 420 46. T. Yamamoto *et al.*, Analysis of the structure and function of EMRE in a yeast expression system. *Biochim*  
421 *Biophys Acta* **1857**, 831-839 (2016).
- 422 47. T. Yamamoto *et al.*, Functional analysis of coiled-coil domains of MCU in mitochondrial calcium uptake.  
423 *Biochim Biophys Acta Bioenerg*, 148061 (2019).
- 424 48. G. Bhosale *et al.*, Pathological consequences of MICU1 mutations on mitochondrial calcium signalling and  
425 bioenergetics. *Biochim Biophys Acta Mol Cell Res* **1864**, 1009-1017 (2017).
- 426 49. K. Mallilankaraman *et al.*, MICU1 Is an Essential Gatekeeper for MCU-Mediated Mitochondrial Ca<sup>2+</sup>  
427 Uptake that Regulates Cell Survival. *Cell* **151**, 630-644 (2012).
- 428 50. K. J. Kamer, Z. Grabarek, V. K. Mootha, High-affinity cooperative Ca<sup>2+</sup> binding by MICU1-MICU2 serves as  
429 an on-off switch for the uniporter. *Embo Rep* **18**, 1397-1411 (2017).
- 430 51. A. Goehring *et al.*, Screening and large-scale expression of membrane proteins in mammalian cells for  
431 structural studies. *Nat Protoc* **9**, 2574-2585 (2014).
- 432 52. S. Q. Zheng *et al.*, MotionCor2: anisotropic correction of beam-induced motion for improved cryo-electron  
433 microscopy. *Nat Methods* **14**, 331-332 (2017).

- 434 53. J. A. Mindell, N. Grigorieff, Accurate determination of local defocus and specimen tilt in electron  
435 microscopy. *J Struct Biol* **142**, 334-347 (2003).
- 436 54. K. Zhang, Gctf: Real-time CTF determination and correction. *J Struct Biol* **193**, 1-12 (2016).
- 437 55. E. F. Pettersen *et al.*, UCSF Chimera--a visualization system for exploratory research and analysis. *J*  
438 *Comput Chem* **25**, 1605-1612 (2004).
- 439 56. S. H. Scheres, S. Chen, Prevention of overfitting in cryo-EM structure determination. *Nat Methods* **9**, 853-  
440 854 (2012).
- 441 57. P. B. Rosenthal, R. Henderson, Optimal determination of particle orientation, absolute hand, and contrast  
442 loss in single-particle electron cryomicroscopy. *J Mol Biol* **333**, 721-745 (2003).
- 443 58. A. Kucukelbir, F. J. Sigworth, H. D. Tagare, Quantifying the local resolution of cryo-EM density maps. *Nat*  
444 *Methods* **11**, 63-65 (2014).
- 445 59. I. W. Davis *et al.*, MolProbity: all-atom contacts and structure validation for proteins and nucleic acids.  
446 *Nucleic Acids Res* **35**, W375-383 (2007).
- 447 60. O. S. Smart, J. G. Neduelil, X. Wang, B. A. Wallace, M. S. Sansom, HOLE: a program for the analysis of the  
448 pore dimensions of ion channel structural models. *J Mol Graph* **14**, 354-360, 376 (1996).
- 449 61. N. Alexander, N. Woetzel, J. Meiler, bcl::Cluster : A method for clustering biological molecules coupled with  
450 visualization in the Pymol Molecular Graphics System. *IEEE Int Conf Comput Adv Bio Med Sci* **2011**, 13-18  
451 (2011).
- 452 62. F. A. Ran *et al.*, Genome engineering using the CRISPR-Cas9 system. *Nat Protoc* **8**, 2281-2308 (2013).

453

## 454 **Acknowledgements**

455 We thank the Cryo-EM Facility Center of Southern University of Science & Technology (Shenzhen)  
456 and the Tsinghua University Branch of China National Center for Protein Sciences (Beijing) for  
457 providing facility support. We would like to thank Qingxi Ma for helpful editing of the manuscript.  
458 Computation was completed on the Yang lab GPU workstation. **Funding:** This work was supported  
459 by funds from the National Key R&D Program of China (2017YFA0504601 and 2016YFA0501100).  
460 The National Science Fund for Distinguished Young Scholars (31625008) and the National Natural  
461 Science Foundation of China (21532004 and 31900857), and the China Postdoctoral Science  
462 Foundation (2018M631449). **Author contributions:** M.Y. conceived, designed, and supervised the  
463 project, built the model, analyzed the data and wrote the manuscript. W.Z., R.G., and L.Y. did the  
464 protein expression, purification, and detergent screening. H.Z., L.Z., and P.W. performed EM sample  
465 preparation, data collection and structural determination. W.Z., J.Y., Y.S. and W.Z. constructed the  
466 knockout cell lines, did the calcium uptake and Co-IP assays. All authors discussed the data of the  
467 manuscript. **Competing interests:** The authors declare no competing financial interests. **Data and**  
468 **materials availability:** The atomic coordinates of the MES and MEMMS have been deposited in the



469 Worldwide Protein Data Bank with the accession codes 6K7X and 6K7Y, respectively. The  
470 corresponding maps have been deposited in the Electron Microscopy Data Bank with the accession  
471 codes EMD-9944 and EMD-9945, respectively.

472

473

474 **Supplementary Materials**

475 Materials and Methods

476 Figures S1-S10

477 Tables S1

478 References (51-62)

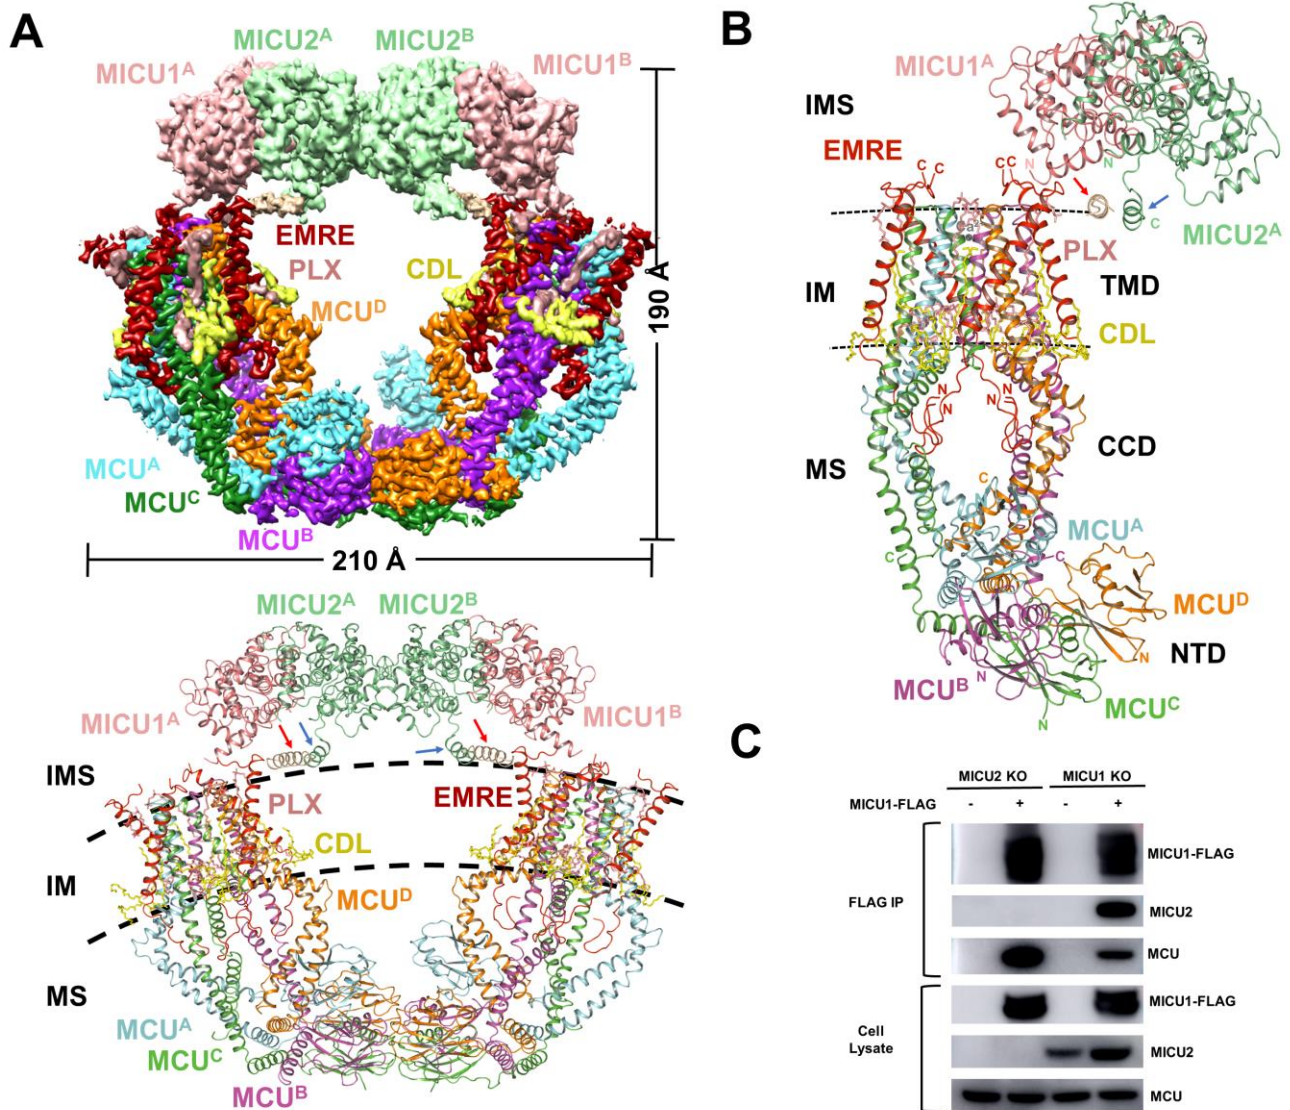

479

480 **Fig. 1. Overall structure of the MCU-EMRE-MICU1-MICU2 supercomplex.**

481 (A) Density map and structural model of MEMMS. PLXs, phosphatidylcholines, are shown in salmon;  
 482 CDLs, cardiolipins, are shown in yellow; subunits of MEMMS are differently colored. IMS,  
 483 intermembrane space; IM, inner membrane; MS, matrix. (B) Hetero-decamer of MEMMS. N and C  
 484 termini of each subunit are labeled. The colors are the same as in A. The position of NTD, CCD and  
 485 TMD of MCU are indicated. (C) FLAG co-immunoprecipitation of MICU1-FLAG expressed in  
 486 MICU1 KO, MICU2 KO HEK 293T cells with transient expression of MICU1-FLAG. Lysates and  
 487 elutes were immunoblotted with anti-FLAG, MCU or MICU2.

488

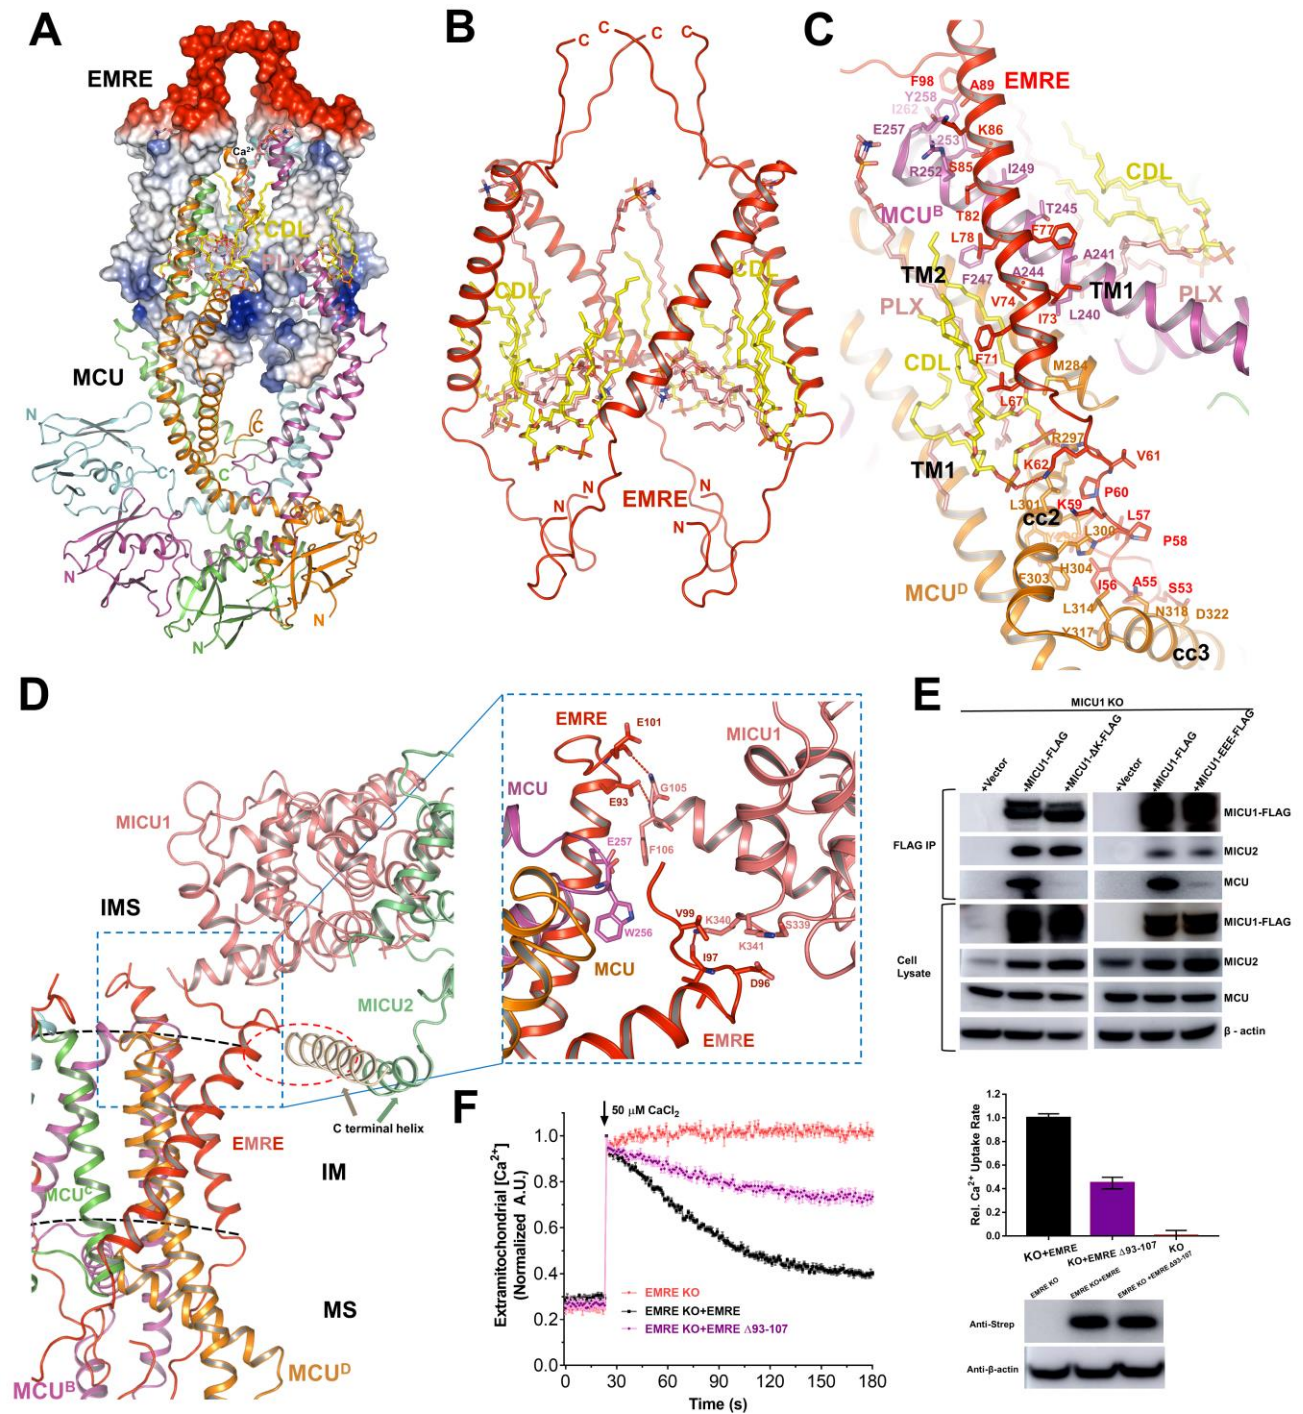

489

490 **Fig. 2. Interactions and functional roles of EMRE.**

491 (A) Four EMRE subunits form a cage surrounding the TMD of MCU. EMRE subunits are shown in  
 492 an electrostatic surface model. The N-terminus of EMRE is positively charged, while the C-terminus  
 493 is negatively charged. MCU subunits are shown in a cartoon model. Viewed from the membrane plane.

494 (B) EMRE subunits and phospholipids form a cage that bundles up the central MCU tetramer. Four  
 495 EMRE subunits are distinguished by red and all N and C-terminals are noted. PLXs are colored salmon.

496 CDLs are colored yellow. **(C)** Detailed interaction between an EMRE (colored red) subunit and two  
497 MCU subunits (colored magenta and orange, respectively). Each EMRE interacts with two MCU.  
498 Transmembrane helix of EMRE interacts with TM1 of one MCU subunit, the N-terminal domain of  
499 EMRE interacts with the neighboring MCU cc2 and cc3. Residues responsible for interactions are  
500 labeled and shown as sticks. Hydrogen bonds are shown as red dashed lines. **(D)** Interactions between  
501 EMREs and one MICU1. The blue dashed box indicates the interactions between the tails of two  
502 EMRE and the one MICU1, the right enlarged dashed box shows the detail. Residues responsible for  
503 interactions are shown as sticks. Hydrogen bonds are shown as red dashed lines. The red dashed circle  
504 indicates interactions between MICU1 C-terminal helix and EMRE. **(E)** FLAG co-  
505 immunoprecipitation of MICU1-FLAG and related mutant constructs expressed in MICU1 knockout  
506 HEK 293T cells. Cells were transfected with MICU1-FLAG, MICU1  $\Delta$ K-FLAG or MICU1-  
507 S339E/K340E/K341E-FLAG plasmids (MICU1-EEE-FLAG). Lysates and elutes were  
508 immunoblotted with anti-FLAG, MCU, MICU2 or  $\beta$ -actin. Mean  $\pm$  SEM,  $n \geq 3$  independent  
509 measurements. **(F)** The mitochondrial  $\text{Ca}^{2+}$  uptake of EMRE mutants at EMRE C-terminal. EMRE  
510 KO cells transiently expressing C-terminal strep tagged EMRE, or strep tagged EMRE  $\Delta$ 93-107 were  
511 given a  $\sim 40 \mu\text{M}$   $\text{Ca}^{2+}$  pulse. EMRE  $\Delta$ 93-107 (colored purple) suppresses channel function compared  
512 with wild-type EMRE (colored black) expressed in EMRE KO cells. Representative traces are shown  
513 on the left and bar graph in the right (mean  $\pm$  SEM,  $n \geq 3$  independent measurements). Western blot  
514 of cell lysates from the different groups were performed to make sure that EMRE expression was  
515 similar by using antibody to strep.  $\beta$ -actin was used as the loading control.

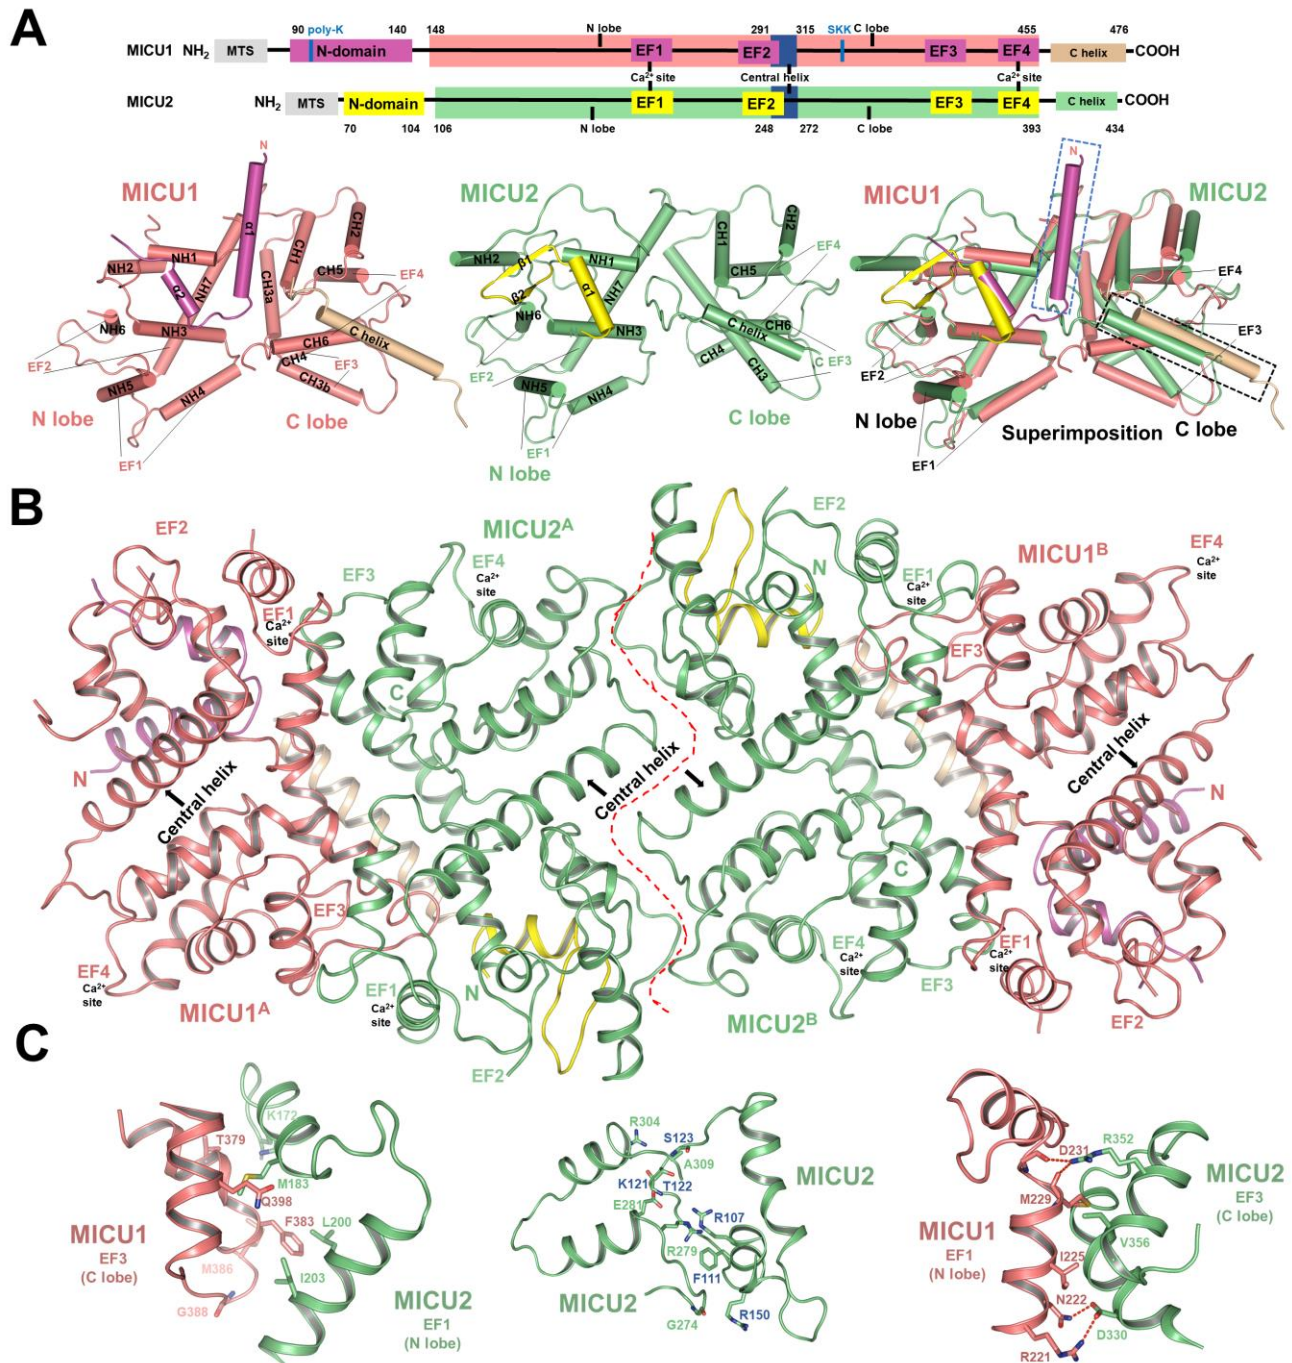

516

517 **Fig. 3. MICUs in the MEMMS.**

518 (A) Schematic domain organization (top), individual cartoon representation (lower left and middle  
 519 panel) and superimposition (lower right) of the overall structure of MICU1 (the N-domain colored in  
 520 magenta, the main body colored in light-pink and C-terminal helix colored in wheat) and MICU2 (the  
 521 N-domain colored in yellow, the main body colored in light-green). The N-lobe, C-lobe, EF hand of  
 522 each protein are indicated. In the superimposed MICU1 and MICU2 structure, the blue dashed box  
 523 indicates the unique N-terminal helix of MICU1, the black dashed box indicates the C-terminal helix

524 of MICU1. N or C termini of each MICU1 or MICU2 monomers are indicated. **(B)** The ‘face-to-face’  
525 interaction between MICU1-MICU2 hetero-dimers and the ‘back-to-back’ interaction between two  
526 MICU2s. The colors are the same as in A, the central helix of each subunit is labeled. **(C)** Detailed  
527 interactions between MICU1 and MICU2. The left panel shows interactions between MICU1 C-  
528 terminal lobe and MICU2 N-terminal lobe. The middle panel shows interactions within MICU2  
529 homodimer. The right panel shows interactions between MICU1 N-terminal lobe and MICU2 C-  
530 terminal lobe. Hydrogen bonds are indicated as red dash lines. The oxygen and nitrogen atoms are  
531 colored red and blue, respectively.

532

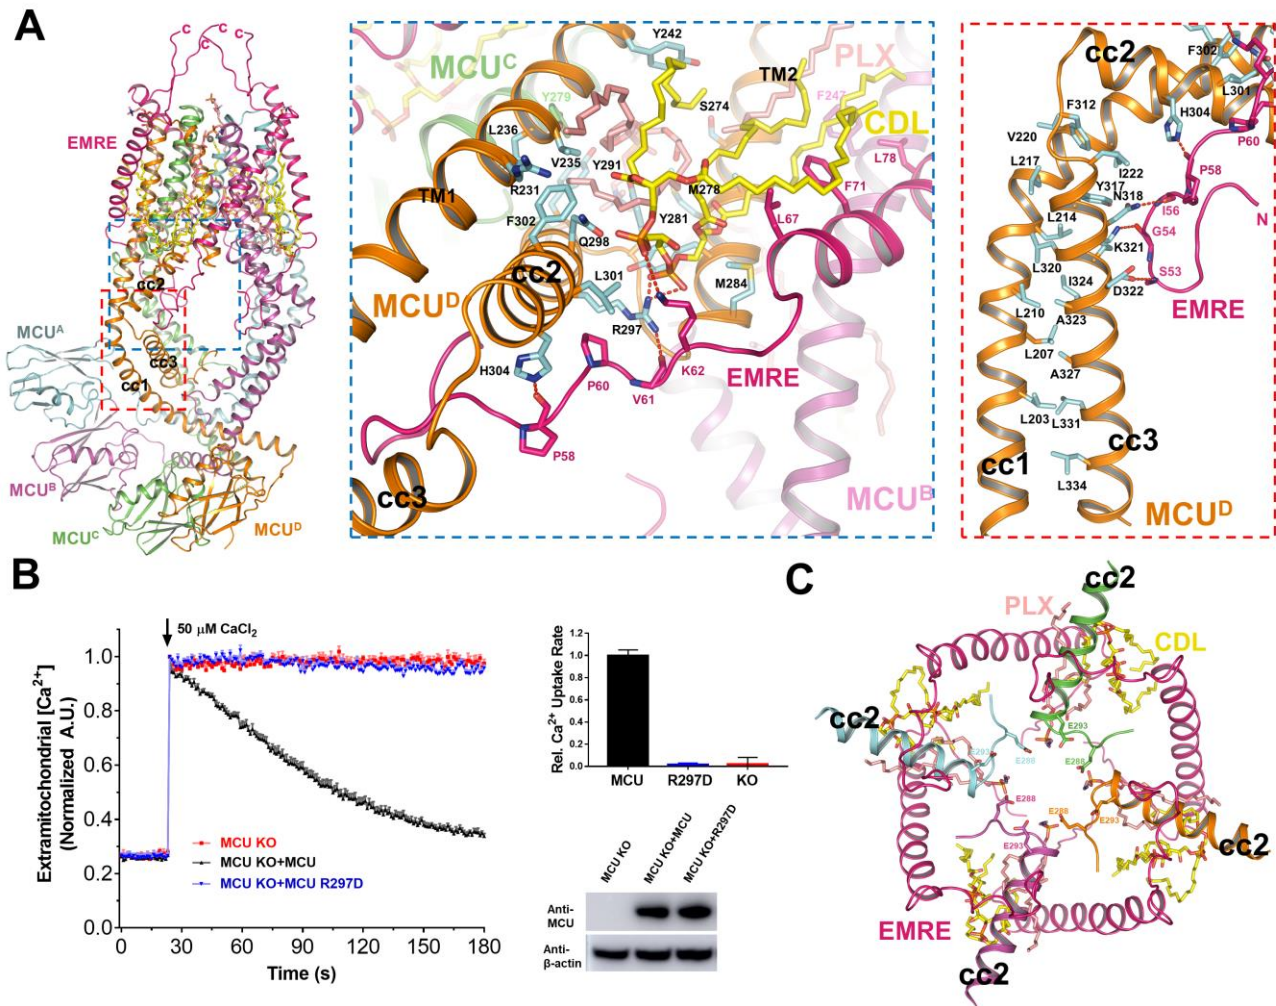

533

534 **Fig. 4. Interactions within the matrix gate of MCU.**

535 (A) Detailed interactions within the matrix gate of MCU complex. The blue dashed box indicates  
 536 interactions between CDL and surrounding subunits, including two MCU subunits (colored magenta  
 537 and orange, respectively) and one EMRE subunit (colored red), and interactions between the N-  
 538 terminal of EMRE and cc2 of MCU. The red dashed box indicates the stable hydrophobic interface  
 539 between MCU cc1 and cc3. Residues responsible for interactions are shown as sticks. Hydrogen bonds  
 540 are shown as red dashed lines. (B) Mitochondrial  $\text{Ca}^{2+}$  uptake phenotype in R297D mutant of MCU.  
 541 MCU KO cells transiently expressing MCU, or MCU R297D were given a  $\sim 40 \mu\text{M}$   $\text{Ca}^{2+}$  pulse. R297D  
 542 (colored blue) completely abolished the channel function. Representative traces are shown on the  
 543 upper and bar graph in the bottom (mean  $\pm$  SEM,  $n \geq 3$  independent measurements). Western blot of  
 544 cell lysates from the different groups were performed to make sure the total amounts of protein  
 545 expression were constant by using antibody to MCU.  $\beta$ -actin was used as the loading control. (C)

546 Intrusion of the PLXs, CDLs and MCU cc2s into the central  $\text{Ca}^{2+}$  channel. Glu<sup>288</sup>s and Glu<sup>293</sup>s on cc2  
547 are shown as sticks. EMREs, cc2, PLXs and CDLs are colored A.  
548



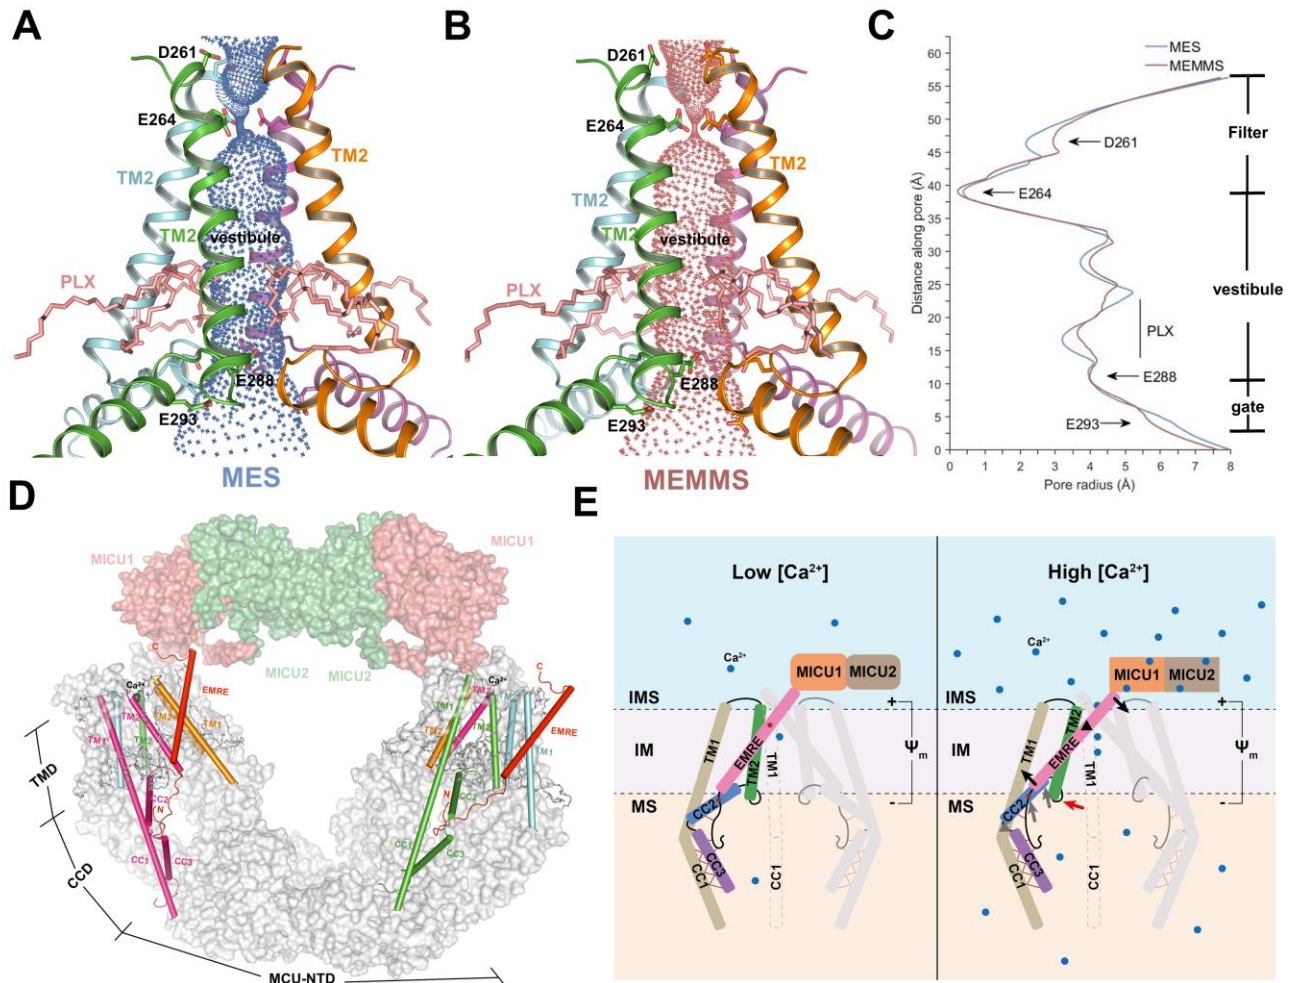

549

550 **Fig 5. Comparison of pore profile in MES and MEMMS, and a proposed model of MCU**  
 551 **complex regulation.**

552 (A) Cartoon model of the transmembrane pore of MES with the ion conduction pathway rendered in  
 553 blue mesh. Asp<sup>261</sup> and Glu<sup>264</sup> at the entrance, and Glu<sup>288</sup> and Glu<sup>293</sup> at the exit of Ca<sup>2+</sup> channel are  
 554 shown as sticks. PLXs are shown as salmon sticks. (B) Cartoon model of the transmembrane pore of  
 555 MEMMS with the ion conduction pathway rendered in brown mesh. Asp<sup>261</sup> and Glu<sup>264</sup> at the entrance,  
 556 and Glu<sup>288</sup> and Glu<sup>293</sup> at the exit of Ca<sup>2+</sup> channel are shown as sticks. PLXs are shown as salmon sticks.  
 557 (C) Pore radius along the ion conduction pathway of MES and MEMMS. Filter, vestibule and gate are  
 558 indicated, the gate residues and PLX are labeled. (D) EMRE anchors on the TM1 of an MCU, while  
 559 the N-terminal interacts with the cc2 and cc3 of the neighboring MCU in the matrix, and the C-terminal  
 560 interacts with MICU1 in the IMS, thus linking up MICU and MCU. All TM2 of MCU, typical TM1  
 561 and neighboring CCD domain are shown as cylindrical helices, the rest of MEMMS are shown as  
 562 surface. (E) Proposed model of how EMRE and MICU regulate the conductivity of MCU

563 supercomplex. Two sets of imagined levers are shown. EMRE is the first lever, with its pivot on TM1,  
564 its C-terminal loop attached to MICU1, and its N-terminal loop attached to CCD. cc2 is the second  
565 lever, with its pivot on the loop linking cc2 and cc3, its N-terminal attached to TM2, and its Arg<sup>297</sup>  
566 attached to EMRE. Arg<sup>297</sup> functions as the point of contact between the first and the second levers.  
567 Pivot and movement of the first lever is indicated by black triangle and arrows, respectively. Pivot and  
568 movement of the second lever is indicated by gray triangle and arrows, respectively. The movement  
569 of TM2 is marked by a red arrow. MICU1/2 conformational change is represented by a shape change.  
570 Membrane and membrane potential are labeled. The left panel is the low [Ca<sup>2+</sup>]; the right panel is the  
571 high [Ca<sup>2+</sup>]. IMS, intermembrane space; IM, inner membrane; MS, matrix.
